# Supplementary material
Source: MDPI journal article supplement (https://www.mdpi.com/2311-7524/8/5/448)
Supplement: s1 [file s1 › horticulturae-1703508-supplementary.pdf]

## SUPPLEMENTARY MATERIAL

### Relation between rind pigmentation and internal quality of blood orange ‘Sanguinelli’. Physico-chemical and sensory studies

Paula Tarancón, Begoña Cebrián, Paula Fernández-Serrano, Cristina Besada\*

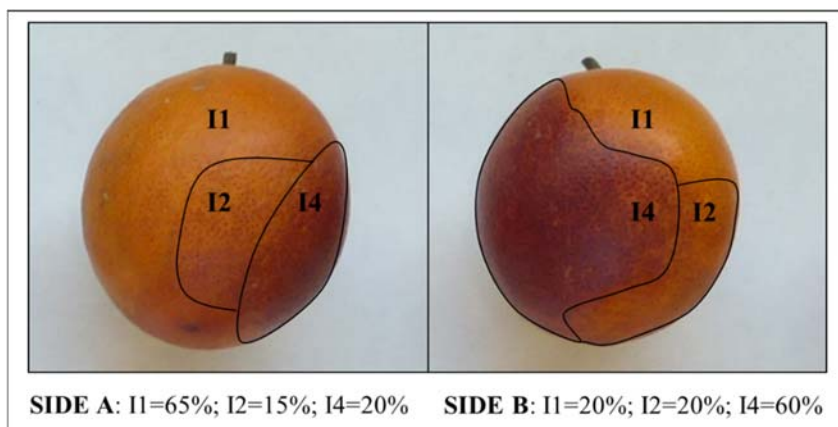

**Figure S1.** Visual estimation of rind colour areas where colour measurements were taken per fruit. After evaluating each side of the fruit (one 180° fruit face and the opposite 180° fruit face), the areas with the same intensity (I) were added and then divided by 2. So this whole fruit showed I1=42.5%, I2=17.5, I4= 40%.

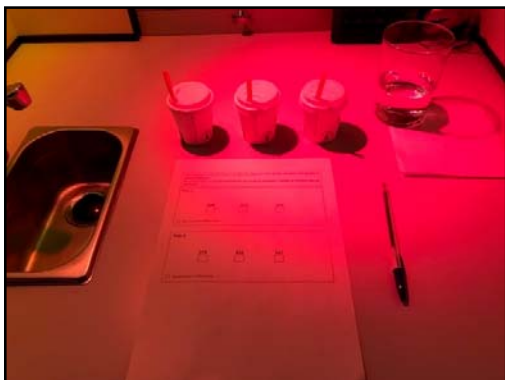

**Figure S2.** Samples presentation in booths for the triangle test.

**Table S1.** Pearson correlation between the colour index ( $a^*/b^*$ ) of rind and juice, and between the colour index ( $a^*/b^*$ ) of juice and total soluble solids

|           | <b><math>a^*/b^*</math> rind - <math>a^*/b^*</math> juice</b> |         | <b><math>a^*/b^*</math> juice - % TSS</b> |         |
|-----------|---------------------------------------------------------------|---------|-------------------------------------------|---------|
|           | Coefficient correlation                                       | p-value | Coefficient correlation                   | p-value |
| Orchard 1 | 0.5                                                           | <0.05   | 0.73                                      | <0.05   |
| Orchard 2 | 0.15                                                          | 0.057   | 0.49                                      | <0.05   |
| Orchard 3 | 0.18                                                          | 0.059   | 0.34                                      | <0.05   |
| All data  | 0.29                                                          | <0.05   | 0.53                                      | <0.05   |
